# Supplementary material
Source: HighWire-hosted journal article supplement (https://bmjopen.bmj.com/content/14/6/e084033)
Supplement: inline-supplementary-material-3 [file inline-supplementary-material-3.pdf]

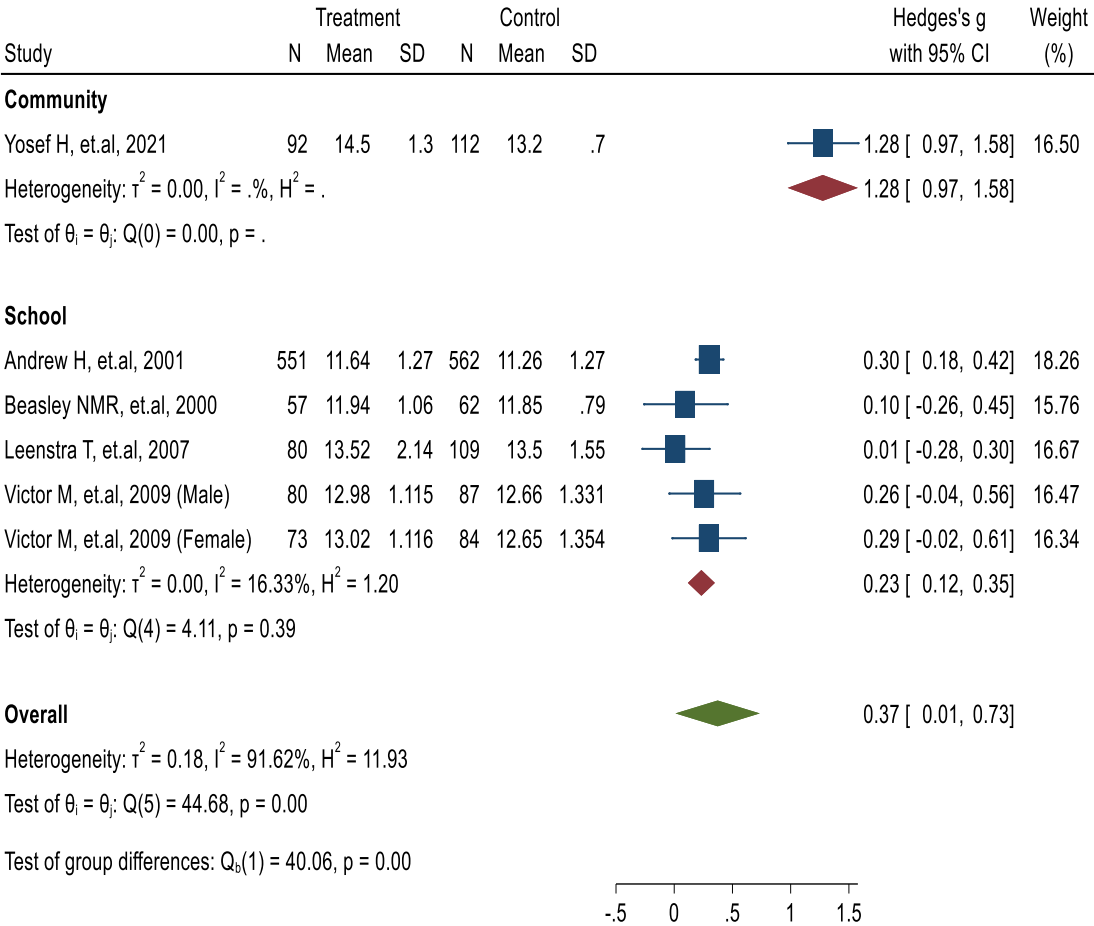

Random-effects REML model

Supplemental Figure 1: Sub-group Meta-analysis of the effect of once-weekly IFAS on Hemoglobin
